# Supplementary material for: Environmental and Pathogenic Carbapenem Resistant Bacteria Isolated from a Wastewater Treatment Plant Harbour Distinct Antibiotic Resistance Mechanisms
Source: MDPI journal article supplement (doi:10.3390/antibiotics10091118), 2021-09-16
Supplement: s1 [file s1]

**Table S1.** Concentrations of carbapenem resistant bacteria in the wastewater influent and discharged effluent after 24 h incubation at 30 °C or 42 °C. Values are expressed in colony forming units per millilitre.

|                           |         | Incubation at 30 °C |                     | Incubation at 42 °C |                     |
|---------------------------|---------|---------------------|---------------------|---------------------|---------------------|
|                           |         | CFU/mL influent     | CFU/mL effluent     | CFU/mL influent     | CFU/mL effluent     |
| Biological sample 1       | Plate 1 | 8.10E+04            | 5.60E+03            | 1.70E+03            | 1.14E+02            |
|                           | Plate 2 | 9.00E+04            | 4.70E+03            | 2.20E+03            | 1.02E+02            |
|                           | Plate 3 | 9.50E+04            | 4.90E+03            | 2.10E+03            | 1.25E+02            |
| Biological sample 2       | Plate 4 | 1.02E+05            | 3.50E+03            | 1.80E+03            | 1.41E+02            |
|                           | Plate 5 | 1.05E+05            | 3.60E+03            | 1.40E+03            | 1.38E+02            |
|                           | Plate 6 | 1.13E+05            | 4.30E+03            | 1.70E+03            | 1.38E+02            |
| Biological sample 3       | Plate 7 | 9.10E+04            | 7.10E+03            | 8.00E+02            | 1.04E+02            |
|                           | Plate 8 | 9.50E+04            | 6.60E+03            | 3.00E+02            | 1.14E+02            |
|                           | Plate 9 | 9.00E+04            | 8.00E+03            | 4.00E+02            | 1.08E+02            |
| Mean ± standard deviation |         | 9.58E+04 ± 9.58E+03 | 5.37E+03 ± 1.74E+03 | 1.38E+03 ± 7.82E+02 | 1.20E+02 ± 1.63E+01 |

**Table S2.** Species identification by 16S rRNA gene sequencing and screening of carbapenem resistance genes in the carbapenem resistant bacteria isolated from the wastewater influent and discharged effluent samples at 30 °C.

| Sampling point      | Species identification            | Total isolated | Carbapenem resistance genes |                   |                |                |                |
|---------------------|-----------------------------------|----------------|-----------------------------|-------------------|----------------|----------------|----------------|
|                     |                                   |                | <i>bla</i> KPC              | <i>bla</i> OXA-48 | <i>bla</i> NDM | <i>bla</i> IMP | <i>bla</i> VIM |
| Wastewater influent | <i>Aeromonas caviae</i>           | 7              | 3                           | -                 | -              | -              | -              |
|                     | <i>Aeromonas salmonicida</i>      | 1              | -                           | -                 | -              | -              | -              |
|                     | <i>Aeromonas veronii</i>          | 7              | 3                           | -                 | -              | -              | -              |
|                     | <i>Pseudomonas entomophila</i>    | 1              | -                           | -                 | -              | -              | -              |
|                     | <i>Pseudomonas fluorescens</i>    | 3              | -                           | -                 | -              | -              | -              |
|                     | <i>Pseudomonas fragi</i>          | 1              | -                           | -                 | -              | -              | -              |
|                     | <i>Pseudomonas lundensis</i>      | 1              | -                           | -                 | -              | -              | -              |
|                     | <i>Pseudomonas migulae</i>        | 1              | -                           | -                 | -              | -              | -              |
|                     | <i>Pseudomonas psychrophila</i>   | 1              | -                           | -                 | -              | -              | -              |
|                     | <i>Pseudomonas putida</i>         | 7              | 2                           | -                 | -              | -              | -              |
|                     | <i>Pseudomonas syringae</i>       | 1              | -                           | -                 | -              | -              | -              |
|                     | <i>Raoultella ornithinolytica</i> | 1              | -                           | -                 | -              | -              | -              |
|                     | Total                             | 32             | 8                           | 0                 | 0              | 0              | 0              |
| Discharged effluent | <i>Acinetobacter pittii</i>       | 1              | -                           | -                 | -              | -              | -              |
|                     | <i>Aeromonas caviae</i>           | 1              | -                           | -                 | -              | -              | -              |
|                     | <i>Aeromonas veronii</i>          | 8              | -                           | -                 | -              | -              | -              |
|                     | <i>Chromobacterium rhizoryzae</i> | 3              | -                           | -                 | -              | -              | -              |
|                     | <i>Pseudomonas entomophila</i>    | 1              | -                           | -                 | -              | -              | -              |
|                     | <i>Pseudomonas fluorescens</i>    | 2              | -                           | -                 | -              | -              | -              |
|                     | <i>Pseudomonas fragi</i>          | 2              | -                           | -                 | -              | -              | -              |
|                     | <i>Pseudomonas monteirii</i>      | 1              | -                           | -                 | -              | -              | -              |
|                     | <i>Pseudomonas psychrophila</i>   | 1              | -                           | -                 | -              | -              | -              |
|                     | <i>Pseudomonas putida</i>         | 6              | -                           | -                 | -              | -              | -              |
|                     | Total                             | 26             | 0                           | 0                 | 0              | 0              | 0              |

**Table S3.** Species identification by 16S rRNA gene sequencing and screening of carbapenem resistance genes in the carbapenem resistant bacteria isolated from the wastewater influent and discharged effluent samples at 42 °C.

| Sampling point      | Species identification            | Total isolated | Carbapenem resistance genes |                              |                           |                           |                           |
|---------------------|-----------------------------------|----------------|-----------------------------|------------------------------|---------------------------|---------------------------|---------------------------|
|                     |                                   |                | <i>bla</i> <sub>KPC</sub>   | <i>bla</i> <sub>OXA-48</sub> | <i>bla</i> <sub>NDM</sub> | <i>bla</i> <sub>IMP</sub> | <i>bla</i> <sub>VIM</sub> |
| Wastewater influent | <i>Acinetobacter baumannii</i>    | 6              | 4                           | -                            | -                         | -                         | 2                         |
|                     | <i>Acinetobacter pittii</i>       | 5              | 3                           | 1                            | -                         | -                         | 1                         |
|                     | <i>Citrobacter amalonaticus</i>   | 1              | 1                           | -                            | -                         | -                         | -                         |
|                     | <i>Citrobacter freundii</i>       | 2              | 2                           | -                            | -                         | -                         | -                         |
|                     | <i>Enterobacter asburiae</i>      | 2              | 1                           | -                            | -                         | -                         | 1                         |
|                     | <i>Escherichia coli</i>           | 6              | 4                           | -                            | -                         | -                         | 2                         |
|                     | <i>Klebsiella pasteurii</i>       | 1              | 1                           | -                            | -                         | -                         | -                         |
|                     | <i>Klebsiella pneumoniae</i>      | 2              | 1                           | 1                            | -                         | -                         | 1                         |
|                     | <i>Raoultella ornithinolytica</i> | 2              | 2                           | -                            | -                         | -                         | -                         |
|                     | Total                             | 27             | 19                          | 2                            | 0                         | 0                         | 7                         |
| Discharged effluent | <i>Acinetobacter baumannii</i>    | 5              | -                           | -                            | -                         | -                         | -                         |
|                     | <i>Acinetobacter pittii</i>       | 1              | -                           | -                            | -                         | -                         | -                         |
|                     | <i>Aeromonas veronii</i>          | 2              | -                           | -                            | -                         | -                         | -                         |
|                     | <i>Citrobacter amalonaticus</i>   | 1              | 1                           | -                            | -                         | -                         | -                         |
|                     | <i>Citrobacter freundii</i>       | 1              | 1                           | -                            | -                         | -                         | 1                         |
|                     | <i>Escherichia coli</i>           | 4              | 4                           | -                            | -                         | -                         | -                         |
|                     | <i>Klebsiella pneumoniae</i>      | 8              | 8                           | -                            | -                         | -                         | -                         |
|                     | Total                             | 22             | 14                          | 0                            | 0                         | 0                         | 1                         |

**Table S4.** Taxonomic identification of the carbapenem resistant bacteria isolated from the discharged effluent samples at 30 °C using BLASTn, SpeciesFinder 2.0 and KmerFinder 3.2.

| BLASTn                            | SpeciesFinder 2.0                   | KmerFinder 3.2                        |
|-----------------------------------|-------------------------------------|---------------------------------------|
| <i>Pseudomonas fluorescens</i>    | <i>Pseudomonas fluorescens</i> *    | <i>Pseudomonas fluorescens</i>        |
| <i>Pseudomonas fragi</i>          | <i>Pseudomonas fragi</i>            | <i>Pseudomonas fragi</i>              |
| <i>Aeromonas caviae</i>           | <i>Aeromonas enteropelogenes</i>    | <i>Aeromonas caviae</i>               |
| <i>Aeromonas veronii</i>          | <i>Aeromonas salmonicida</i>        | <i>Aeromonas veronii</i>              |
| <i>Chromobacterium rhizoryzae</i> | <i>Chromobacterium haemolyticum</i> | <i>Chromobacterium rhizoryzae</i>     |
| <i>Pseudomonas entomophila</i>    | <i>Pseudomonas putida</i> *         | <i>Pseudomonas entomophila</i>        |
| <i>Pseudomonas monteilii</i>      | <i>Pseudomonas putida</i> *         | <i>Pseudomonas monteilii</i>          |
| <i>Pseudomonas psychrophila</i>   | <i>Pseudomonas fragi</i>            | <i>Pseudomonas fragi</i>              |
| <i>Pseudomonas putida</i>         | <i>Pseudomonas putida</i> *         | <i>Pseudomonas</i> sp. URMO17WK12:I11 |
| <i>Acinetobacter pittii</i>       | <i>Acinetobacter</i> sp. 151 *      | <i>Acinetobacter oleivorans</i>       |

\* - Fail in the confidence of the result

**Table S5.** Taxonomic identification of the carbapenem resistant bacteria isolated from the discharged effluent samples at 42 °C using BLASTn, SpeciesFinder 2.0 and KmerFinder 3.2.

| BLASTn                          | SpeciesFinder 2.0               | KmerFinder 3.2                   |
|---------------------------------|---------------------------------|----------------------------------|
| <i>Aeromonas veronii</i>        | <i>Aeromonas veronii</i>        | <i>Aeromonas veronii</i>         |
| <i>Klebsiella pneumoniae</i>    | <i>Klebsiella pneumoniae</i> *  | <i>Klebsiella pneumoniae</i>     |
| <i>Acinetobacter baumannii</i>  | Acinetobacter sp. 148           | <i>Acinetobacter baumannii</i>   |
| <i>Acinetobacter pittii</i>     | Acinetobacter sp. 159           | <i>Acinetobacter pittii</i>      |
| <i>Escherichia coli</i>         | <i>Shigella sonnei</i>          | <i>Escherichia coli</i>          |
| <i>Citrobacter amalonaticus</i> | <i>Citrobacter amalonaticus</i> | <i>Citrobacter</i> sp. Y3        |
| <i>Citrobacter freundii</i>     | <i>Citrobacter freundii</i>     | <i>Citrobacter portucalensis</i> |

\* - Fail in the confidence of the result

**Table S6.** Acquired AB resistance genes present in the whole genomes of the carbapenem resistant bacteria isolated from the discharged effluent samples at 30 °C.

| Bacteria                                 | $\beta$ -lactams                                                                                                                                                                     | Aminoglycosides                                                                                                                                                 | Fluoroquinolones     | Macrolides  | Phenicol     | Rifampicin | Sulphonamides             | Trimethoprim  |
|------------------------------------------|--------------------------------------------------------------------------------------------------------------------------------------------------------------------------------------|-----------------------------------------------------------------------------------------------------------------------------------------------------------------|----------------------|-------------|--------------|------------|---------------------------|---------------|
| <i>Acinetobacter oleivorans</i>          | <i>bla</i> <sub>ADC-25</sub> , <i>bla</i> <sub>OXA-304</sub>                                                                                                                         | -                                                                                                                                                               | -                    | -           | -            | -          | -                         | -             |
| <i>Aeromonas caviae</i>                  | <i>bla</i> <sub>MOX-4</sub> , <i>bla</i> <sub>MOX-6</sub>                                                                                                                            | -                                                                                                                                                               | -                    | -           | -            | -          | <i>sul1</i>               | <i>dfrA15</i> |
| <i>Aeromonas veronii</i>                 | <i>ampS</i> , <i>bla</i> <sub>FOX-2</sub> , <i>bla</i> <sub>MOX-3</sub> , <i>bla</i> <sub>OXA-1</sub> ,<br><i>bla</i> <sub>OXA-10</sub> , <i>cphA1</i> , <i>cphA4</i> , <i>cphA7</i> | <i>aac(3)-IId</i> , <i>aac(6')-Ib</i> , <i>aac(6')-Ib3</i> , <i>aac(6')-Ib-cr</i> ,<br><i>aadA1</i> , <i>aph(3')-Ia</i> , <i>aph(3'')-Ib</i> , <i>aph(6)-Id</i> | <i>aac(6')-Ib-cr</i> | <i>mphA</i> | <i>catB3</i> | ARR-3      | <i>sul1</i> , <i>sul2</i> | -             |
| <i>Chromobacterium rhizoryzae</i>        | -                                                                                                                                                                                    | -                                                                                                                                                               | -                    | -           | -            | -          | -                         | -             |
| <i>Pseudomonas entomophila</i>           | -                                                                                                                                                                                    | -                                                                                                                                                               | -                    | -           | -            | -          | -                         | -             |
| <i>Pseudomonas fluorescens</i>           | -                                                                                                                                                                                    | -                                                                                                                                                               | -                    | -           | -            | -          | -                         | -             |
| <i>Pseudomonas fragi</i>                 | -                                                                                                                                                                                    | -                                                                                                                                                               | -                    | -           | -            | -          | -                         | -             |
| <i>Pseudomonas fragi</i>                 | -                                                                                                                                                                                    | -                                                                                                                                                               | -                    | -           | -            | -          | -                         | -             |
| <i>Pseudomonas monteilii</i>             | -                                                                                                                                                                                    | -                                                                                                                                                               | -                    | -           | -            | -          | -                         | -             |
| <i>Pseudomonas</i> sp.<br>URMO17WK12:I11 | -                                                                                                                                                                                    | -                                                                                                                                                               | -                    | -           | -            | -          | -                         | -             |

**Table S7.** Acquired AB resistance genes present in the whole genomes of the carbapenem resistant bacteria isolated from the discharged effluent samples at 42 °C.

| Bacteria                         | β-lactams                                                                                                                                                                                                                                                                                         | Aminoglycosides                                                                                                                                                                         | Colistin     | Fluoroquinolones                                             | Fosfomycin   | Macrolides                | Phenicol     | Sulphonamides             | Tetracyclines | Trimethoprim  |
|----------------------------------|---------------------------------------------------------------------------------------------------------------------------------------------------------------------------------------------------------------------------------------------------------------------------------------------------|-----------------------------------------------------------------------------------------------------------------------------------------------------------------------------------------|--------------|--------------------------------------------------------------|--------------|---------------------------|--------------|---------------------------|---------------|---------------|
| <i>Acinetobacter baumannii</i>   | <i>bla</i> <sub>ADC25</sub> , <i>bla</i> <sub>OXA-10</sub> ,<br><i>bla</i> <sub>OXA-24</sub> , <i>bla</i> <sub>OXA-98</sub>                                                                                                                                                                       | <i>aadA1</i> , <i>aac</i> (6′)- <i>lb-cr</i> , <i>aac</i> (6′)- <i>lb3</i>                                                                                                              | -            | <i>aac</i> (6′)- <i>lb-cr</i>                                | -            | <i>mphE</i> , <i>msrE</i> | -            | -                         | -             | -             |
| <i>Acinetobacter pittii</i>      | <i>bla</i> <sub>ADC-25</sub> , <i>bla</i> <sub>OXA-255</sub> ,<br><i>bla</i> <sub>OXA-506</sub> , <i>bla</i> <sub>OXA-564</sub>                                                                                                                                                                   | -                                                                                                                                                                                       | -            | -                                                            | -            | -                         | -            | -                         | -             | -             |
| <i>Aeromonas veronii</i>         | <i>ampS</i> , <i>cphA4</i> , <i>cphA7</i>                                                                                                                                                                                                                                                         | -                                                                                                                                                                                       | -            | -                                                            | -            | -                         | -            | -                         | <i>tetE</i>   | -             |
| <i>Citrobacter portucalensis</i> | <i>bla</i> <sub>CMY-129</sub> , <i>bla</i> <sub>KPC-2</sub> ,<br><i>bla</i> <sub>SHV-12</sub> , <i>bla</i> <sub>TEM-1A</sub> ,<br><i>bla</i> <sub>TEM-1C</sub> , <i>bla</i> <sub>TEM-40</sub> ,<br><i>bla</i> <sub>TEM-150</sub> , <i>bla</i> <sub>TEM-171</sub> ,<br><i>bla</i> <sub>VIM-1</sub> | <i>aadA1</i> , <i>aac</i> (6′)- <i>lb-cr</i> , <i>aac</i> (6′)- <i>lb3</i> , <i>aph</i> (3′)- <i>XV</i>                                                                                 | -            | <i>aac</i> (6′)- <i>lb-cr</i> , <i>qnrB6</i>                 | <i>fosA7</i> | -                         | <i>catB2</i> | <i>sul1</i>               | <i>tetA</i>   | <i>dfrA1</i>  |
| <i>Citrobacter</i> sp. Y3        | <i>bla</i> <sub>KPC-2</sub> , <i>bla</i> <sub>OXA-1</sub> ,<br><i>bla</i> <sub>OXA-2</sub> , <i>bla</i> <sub>TEM-1A</sub> ,<br><i>bla</i> <sub>TEM-1C</sub> , <i>bla</i> <sub>TEM-40</sub> ,<br><i>bla</i> <sub>TEM-150</sub> , <i>bla</i> <sub>TEM-171</sub>                                     | <i>aac</i> (6′)- <i>lb-cr</i> , <i>aac</i> (6′)- <i>lb3</i>                                                                                                                             | -            | <i>aac</i> (6′)- <i>lb-cr</i> , <i>oqxA</i> ,<br><i>oqxB</i> | -            | -                         | <i>catB3</i> | <i>sul1</i>               | -             | -             |
| <i>Escherichia coli</i>          | <i>bla</i> <sub>KPC-3</sub> , <i>bla</i> <sub>OXA-9</sub> ,<br><i>bla</i> <sub>TEM-1A</sub>                                                                                                                                                                                                       | <i>aac</i> (6′)- <i>lb</i> , <i>aac</i> (6′)- <i>lb-cr</i> ,<br><i>aadA1</i> , <i>aadA2b</i> , <i>ant</i> (2′′)- <i>la</i> ,<br><i>aph</i> (3′′)- <i>lb</i> , <i>aph</i> (6)- <i>ld</i> | <i>mcr-9</i> | <i>aac</i> (6′)- <i>lb-cr</i> , <i>qnrA1</i>                 | -            | -                         | -            | <i>sul1</i> , <i>sul2</i> | -             | <i>dfrA14</i> |
| <i>Klebsiella pneumoniae</i>     | <i>bla</i> <sub>KPC-3</sub> , <i>bla</i> <sub>OXA-9</sub> ,<br><i>bla</i> <sub>SHV-101</sub> , <i>bla</i> <sub>TEM-1A</sub>                                                                                                                                                                       | <i>aadA1</i> , <i>aac</i> (6′)- <i>lb</i> , <i>aac</i> (6′)- <i>lb-cr</i> , <i>aph</i> (3′′)- <i>lb</i> , <i>aph</i> (6)- <i>ld</i>                                                     | -            | <i>aac</i> (6′)- <i>lb-cr</i> , <i>oqxA</i> ,<br><i>oqxB</i> | <i>fosA</i>  | -                         | -            | <i>sul2</i>               | -             | <i>dfrA14</i> |

**Table S8.** Information about the sequence and amplicon size of the primers and probes used in each *TaqMan* qPCR reaction.

| Gene                        | Primer/Probe | Sequence (5' – 3')                  | Amplicon (bp) |
|-----------------------------|--------------|-------------------------------------|---------------|
| <i>bla<sub>KPC</sub></i>    | KPC Fw       | GACGGAAAGCTTACAAAACTGACA            | 259           |
|                             | KPC Rv       | CTTGTCATCCTTGTTAGGCG                |               |
|                             | KPC Probe    | FAM-ACTGGGCAGTCGGAGACAAAACCGGA-BHQ1 |               |
| <i>bla<sub>OXA-48</sub></i> | OXA-48 Fw    | TTCGAATTTCGGCCACGG                  | 204           |
|                             | OXA-48 Rv    | CATCAAGTTCAACCCAACCG                |               |
|                             | OXA-48 Probe | HEX-CCATGCTGACCGAAGCCAATGGTG-BHQ1   |               |
| <i>bla<sub>NDM</sub></i>    | NDM Fw       | GGTTTGCGATCTGGTTTTTC                | 181           |
|                             | NDM Rv       | ATCCAGTTGAGGATCTGGGC                |               |
|                             | NDM Probe    | FAM-CGGGGCAGTCGCTTCCAACGGTT-BHQ1    |               |
| <i>bla<sub>IMP</sub></i>    | IMP Fw       | GGAATAGAGTGGCTTAAYTCTC              | 275           |
|                             | IMP Rv       | CAAGCTTCTATATTGCGTCACC              |               |
|                             | IMP Probe    | HEX-TTATCCAGGCCCCGGGACACAC-BHQ1     |               |
| <i>bla<sub>VIM</sub></i>    | VIM Fw       | GATGAGTTGCTTTTGATTGATACAGC          | 153           |
|                             | VIM Rv       | CGCCCGAAGGACATCAA                   |               |
|                             | VIM Probe    | ROX-ACGCACTTTCATGACGACCGCGTC-BHQ2   |               |



**Table S9.** Information about the concentrations and volumes of mastermix, primers, probes, DNA templates and nuclease free water used in each *TaqMan* qPCR reaction.

| <i>TaqMan</i> qPCR                                                                                                        | Mix reaction                                                                                                                          |
|---------------------------------------------------------------------------------------------------------------------------|---------------------------------------------------------------------------------------------------------------------------------------|
| <i>TaqMan</i> multiplex qPCR 1:<br><i>bla<sub>KPC</sub></i> and <i>bla<sub>OXA-48</sub></i> genes                         | 10 µL SensiFAST Probe No-ROX Kit (Bioline, London, UK)                                                                                |
|                                                                                                                           | 400 nM <i>bla<sub>KPC</sub></i> forward and reverse primers; 200 nM <i>bla<sub>OXA-48</sub></i> forward and reverse primers           |
|                                                                                                                           | 100 nM <i>bla<sub>KPC</sub></i> and <i>bla<sub>OXA-48</sub></i> <i>TaqMan</i> probes                                                  |
|                                                                                                                           | 50 ng <i>bla<sub>KPC</sub></i> and <i>bla<sub>OXA-48</sub></i> DNA templates                                                          |
|                                                                                                                           | Nuclease free water (to make 20 µL)                                                                                                   |
| <i>TaqMan</i> multiplex qPCR 2:<br><i>bla<sub>NDM</sub></i> , <i>bla<sub>IMP</sub></i> and <i>bla<sub>VIM</sub></i> genes | 10 µL SensiFAST Probe No-ROX Kit (Bioline, London, UK)                                                                                |
|                                                                                                                           | 200 nM <i>bla<sub>NDM</sub></i> , <i>bla<sub>IMP</sub></i> and <i>bla<sub>VIM</sub></i> forward and reverse primers                   |
|                                                                                                                           | 100 nM <i>bla<sub>NDM</sub></i> and <i>bla<sub>IMP</sub></i> <i>TaqMan</i> probes; 10 nM <i>bla<sub>VIM</sub></i> <i>TaqMan</i> probe |
|                                                                                                                           | 50 ng <i>bla<sub>NDM</sub></i> , <i>bla<sub>IMP</sub></i> and <i>bla<sub>VIM</sub></i> DNA templates                                  |
|                                                                                                                           | Nuclease free water (to make 20 µL)                                                                                                   |
